# Supplementary material for: Characterization of a Novel Group of Listeria Phages That Target Serotype 4b Listeria monocytogenes
Source: PubMed Central journal article supplement (PMC8070769; doi:10.3390/v13040671), 2021-04-14
Supplement: viruses-13-00671-s001.pdf [file viruses-13-00671-s001.pdf]

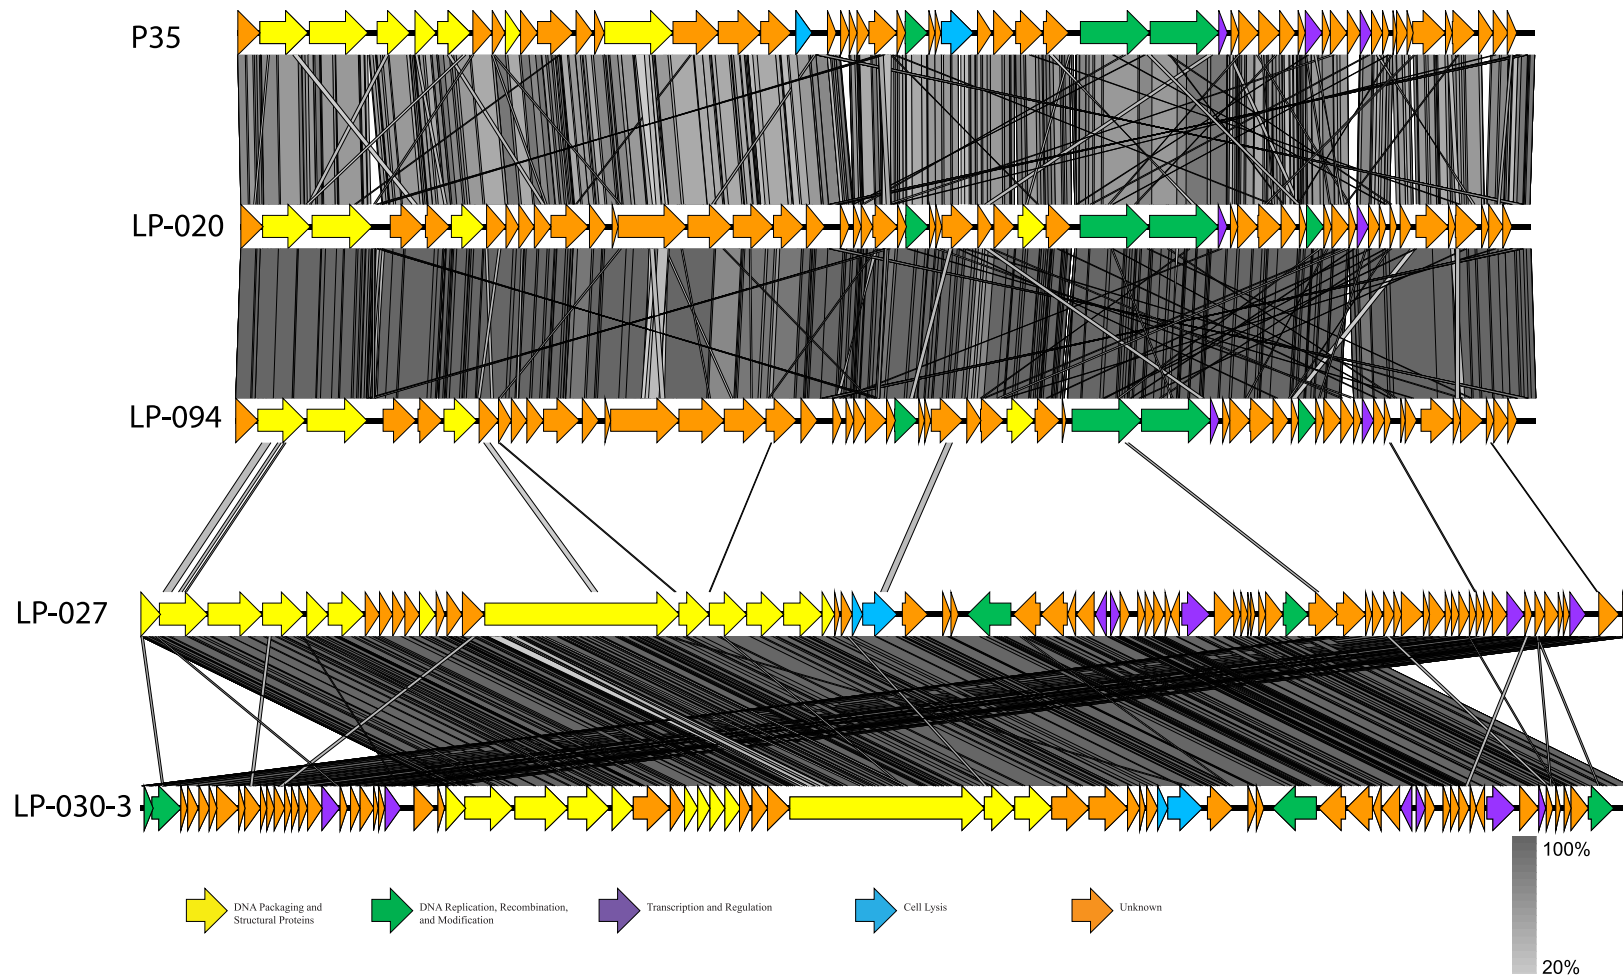

**Figure S1.** Linear tBLASTx comparisons of representative P35-like and LP-30-3-like *Listeria* phages. Genes are represented by arrows and are colored based on putative function (see key at bottom). The shaded region between genomes represents amino acid similarity, with darker gray representing higher similarity and lighter gray indicating lower similarity (see scale at bottom right).

**Table S1.** Phage lifestyle prediction.

| <b>Phage</b> | <b>Predicted Class</b> | <b>Prediction Confidence</b> | <b>Averaged Probability</b> | <b>Standard Deviation</b> |
|--------------|------------------------|------------------------------|-----------------------------|---------------------------|
| LP-024       | Temperate              | Confident                    | 0.592                       | 0.038                     |
| LP-027       | Temperate              | Confident                    | 0.589                       | 0.032                     |
| LP-020       | Lytic                  | Non-Confident                | 0.507                       | 0.03                      |
| LP-021       | Temperate              | Non-Confident                | 0.512                       | 0.036                     |
| LP-053       | Temperate              | Non-Confident                | 0.512                       | 0.057                     |
| LP-054       | Temperate              | Non-Confident                | 0.514                       | 0.045                     |
| LP-057       | Lytic                  | Non-Confident                | 0.507                       | 0.024                     |
| LP-085       | Temperate              | Non-Confident                | 0.531                       | 0.035                     |
| LP-094       | Temperate              | Non-Confident                | 0.511                       | 0.039                     |

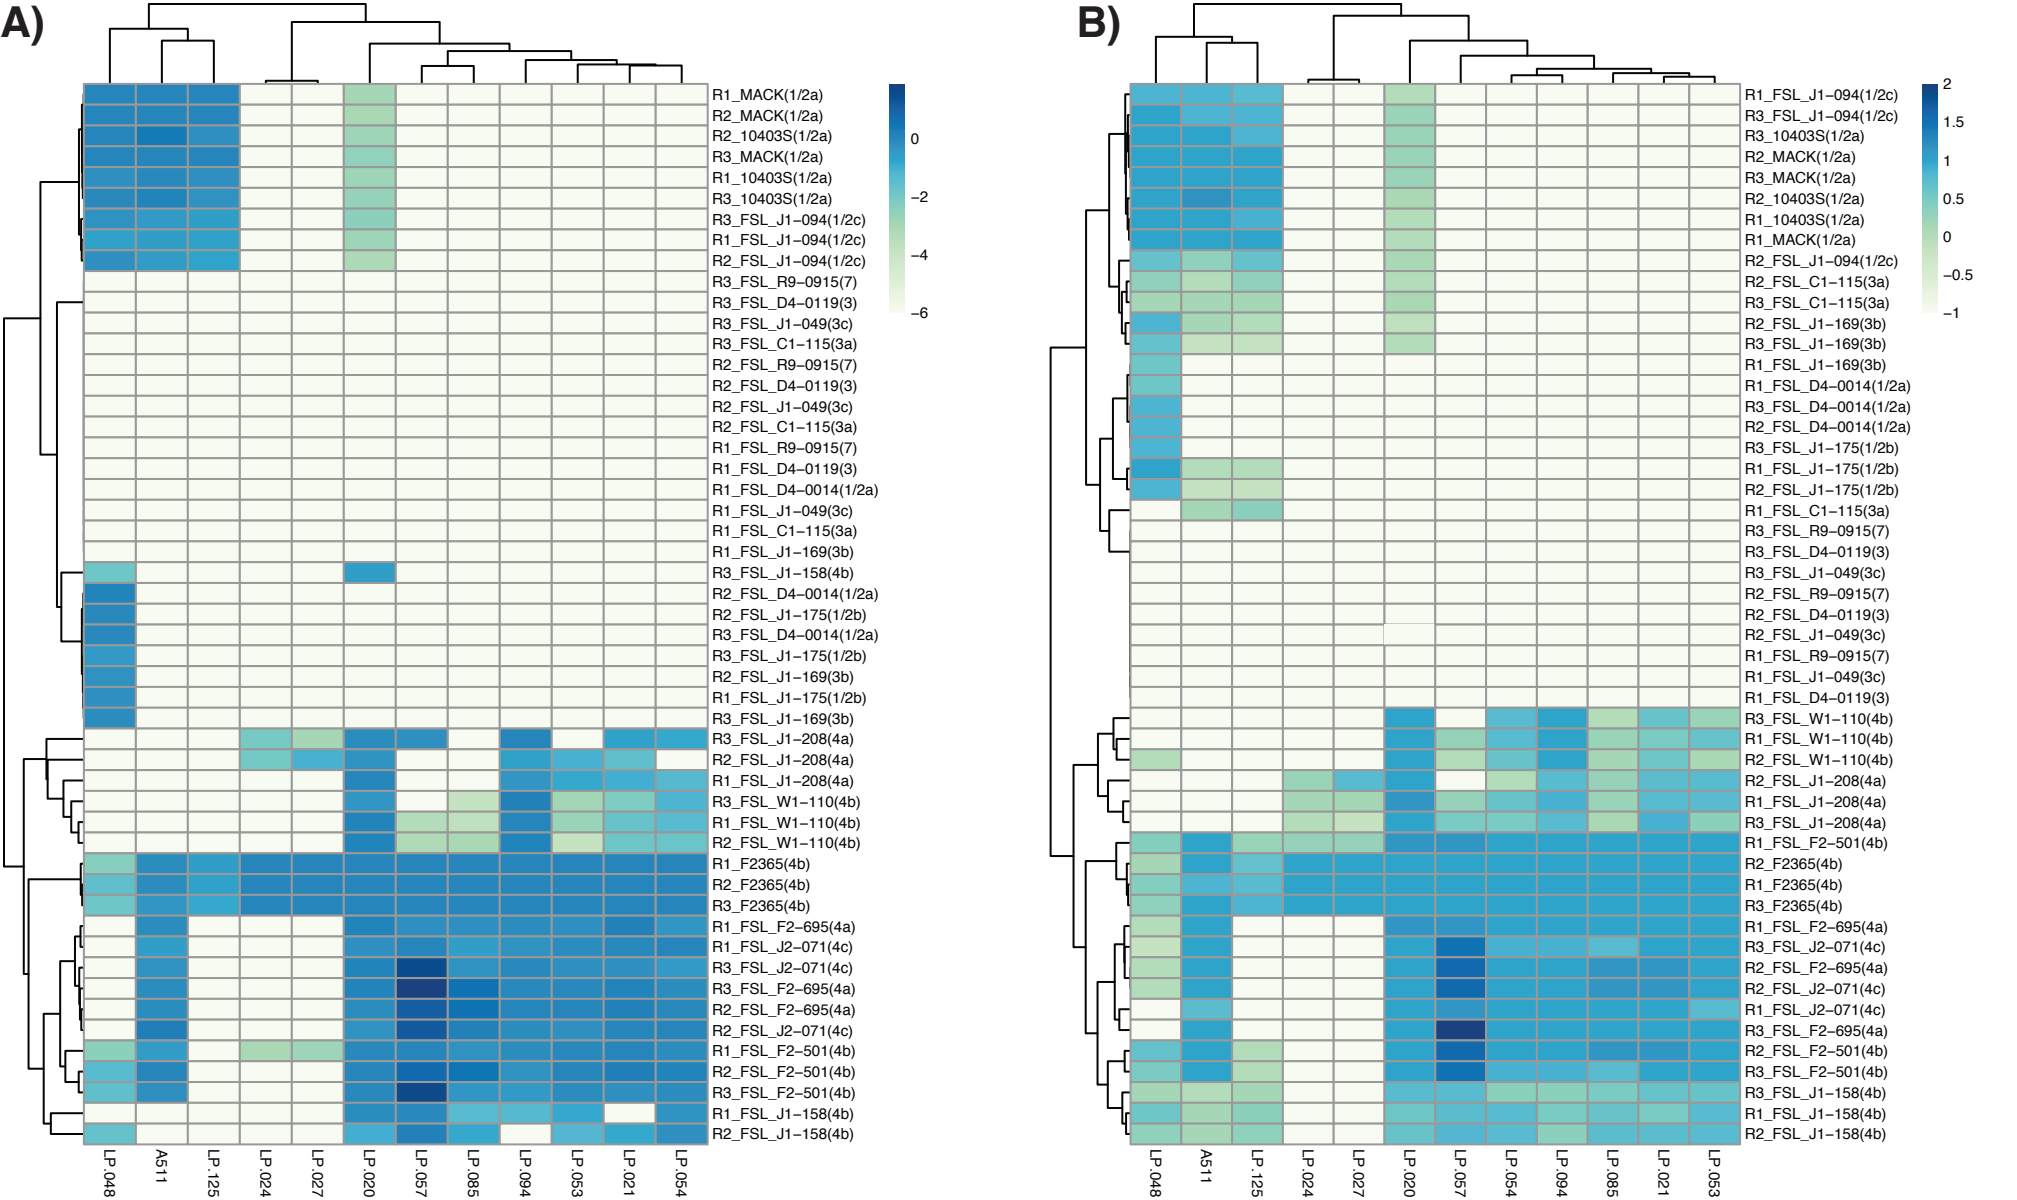

**Figure S2.** Host range analysis of *Listeria* phages against a panel of *Listeria monocytogenes* strains that represent different serotypes. Panel **A)** represent the clustered efficiency of plaquing (EOP) results of three individual replicates where values represent the log transformed efficiencies of plaquing of each phage against each bacterial strain compared to the phage propagation host strain. Panel **B)** values represent the clustered efficiency of activity (EOA) results of three individual replicates where values represent the greatest dilution factor where inhibitory phage activity was observed against each strain relative to the phage propagation host strain.
